# Supplementary material for: Diaza-18-crown-6 appended dual 7-hydroxyquinolines; mercury ion recognition in aqueous solution
Source: Royal Society of Chemistry journal article supplement (doi:10.1039/b801366g), 2008-01-01
Supplement: b801366g.pdf [file b801366g.pdf]

***Supplementary Information:***

**Diaza-18-crown-6 Appended Dual  
7-Hydroxyquinolines; Mercury Ion Recognition in  
Aqueous Solution**

*Mei-Lin Ho,<sup>a</sup> Kew-Yu Chen,<sup>a</sup> Lai-Chin Wu,<sup>a</sup> Jiun-Yi Shen,<sup>a</sup> Gene-Hsiang Lee,<sup>a</sup> Mei-Ju Ko,<sup>b</sup>*

*Chih-Chieh Wang,<sup>b</sup> Jyh-Fu Lee,<sup>c</sup> and Pi-Tai Chou\*<sup>a</sup>*

<sup>a</sup>Department of Chemistry and Instrumentation Center, National Taiwan University, Taipei 106,

Taiwan, Email: chop@ntu.edu.tw

<sup>b</sup>Department of Chemistry, Soochow University, Taipei 111, Taiwan.

<sup>c</sup>National Synchrotron Radiation Research Center, Hsinchu 300, Taiwan.

|                                                                                                         |       |
|---------------------------------------------------------------------------------------------------------|-------|
| <b>Table of contents</b> .....                                                                          | S1-S2 |
| 1. General information and Materials. ....                                                              | S3    |
| 2. Synthesis of <b>TDBQ</b> .....                                                                       | S3-S4 |
| 3. <sup>1</sup> H NMR spectrum of <b>TDBQ</b> in CDCl <sub>3</sub> . (Figure S1).....                   | S4    |
| 4. The extension of <sup>1</sup> H NMR spectrum of <b>TDBQ</b> in CDCl <sub>3</sub> . (Figure S2) ..... | S5    |

|                                                                                                                                                            |         |
|------------------------------------------------------------------------------------------------------------------------------------------------------------|---------|
| 5. $^{13}\text{C}$ NMR (125 MHz, $\text{CDCl}_3$ ) spectrum of compound <b>TDBQ</b> . (Figure S3) .....                                                    | S6      |
| 6. HRMS spectrum of <b>TDBQ</b> . (Figure S4).....                                                                                                         | S7      |
| 7. UV-Vis and Fluorescence Titration of Compounds <b>TDBQ</b> with $\text{Hg}^{2+}$ Ions.....                                                              | S7      |
| 8. The derivation of association constant of 1:2 binding ratio from the absorption titration of <b>TDBQ</b><br>upon addition of $\text{Hg}^{2+}$ .....     | S8-S9   |
| 9. Preparation of <b>TDBQ</b> -mercury crystal.....                                                                                                        | S9      |
| 10. Crystallographic Data Collection and Refinement of <b>TDBQ</b> -mercury crystal. ....                                                                  | S9-S10  |
| 11. ORTEP diagram of (a) <b>TDBQ</b> and (b) <b>TDBQ</b> -mercury crystal with thermal ellipsoids shown at<br>30% probability level. (Figure S5).....      | S11     |
| 12. Selected Bond Length ( $\text{\AA}$ ) and Angles ( $^\circ$ ) for <b>TDBQ</b> -mercury crystal. (Table S1) .....                                       | S12     |
| 13. Crystallographic Data and Refinement Parameters for <b>TDBQ</b> and <b>TDBQ</b> -mercury crystal.<br>(Table S2) .....                                  | S12-S13 |
| 14. Measurement of XANES.....                                                                                                                              | S13     |
| 15. Normalized XANES spectra for <b>TDBQ</b> -mercury crystal (- • -), $\text{HgCl}_2$ (Gray), and $\text{Hg}_2\text{Cl}_2$<br>(black) (Figure<br>S6)..... | S14     |
| 16. Acid-base absorption titration of <b>TDBQ</b> . (Figure S7) .....                                                                                      | S15     |
| 17. Competitive experiments. (Figure S8).....                                                                                                              | S16     |
| 18. References.....                                                                                                                                        | S17     |

**General information and Materials.** All solvents were distilled from appropriate drying agents prior to use. Commercially available reagents were used without further purification unless otherwise stated. All reactions were monitored by TLC with Macherey-Nagel pre-coated glassic sheets (0.20 mm with fluorescent indicator UV254). Compounds were visualized with UV light at 254 nm and 365 nm. Flash column chromatography was carried out using silica gel from Merck (230-400 mesh). Infrared spectra were recorded on a Nicolet Magna II 550 FTIR apparatus with automatic background subtraction.  $^1\text{H}$  NMR and  $^{13}\text{C}$  NMR spectra were recorded on Varian Unity 400 or Bruker Avance 400 spectrometer at 400 MHz and 100 MHz, respectively. Chemical shifts ( $\delta$ ) are quoted in parts per million (ppm) and coupling constant ( $J$ ) are recorded in Hertz (Hz). Low and high resolution mass spectra were recorded by Gas Chromatograph-Mass Spectrometer (Finnigan MAT TSQ-46C GC/MS/MS/ DS).

**8,8'-(1,4,10,13-tetraoxa-7,16-diazacyclooctadecane-7,16-diyl)bis(methylene)diquinolin-7-ol**

(**TDBQ**, see the Figure S1-S2). A solution of anhydrous toluene (50 ml), 4, 13-diaza-18-crown-6 (100 mg, 0.38 mmol), 7-hydroxyquinoline (111 mg, 0.76 mmol), and paraformaldehyde (23 mg,

0.76 mmol) was refluxed for 20 hours. The solvent was evaporated under reduced pressure, and residue was separated by chromatography on silica gel using MeOH/NH<sub>4</sub>OH (4/1) as eluant to afford **TDBQ** (132 mg, 60 %). <sup>1</sup>H NMR (400 MHz, CDCl<sub>3</sub>, in ppm): δ 8.79 (dd, *J*<sub>1</sub> = 4.2 Hz, *J*<sub>2</sub> = 1.4 Hz, 2H), 8.04 (dd, *J*<sub>1</sub> = 8.1 Hz, *J*<sub>2</sub> = 1.4 Hz, 2H), 7.64 (d, *J* = 8.8 Hz, 2H), 7.22 (dd, *J*<sub>1</sub> = 8.1 Hz, *J*<sub>2</sub> = 4.2 Hz, 2H), 7.18 (d, *J* = 8.8 Hz, 2H), 4.60 (s, 4H), 3.77 (t, *J* = 5.4 Hz, 8H), 3.65 (s, 8H), 3.01 (t, *J* = 5.4 Hz, 8H). <sup>13</sup>C NMR (100 MHz, CDCl<sub>3</sub>, in ppm): δ 159.91, 149.35, 147.86, 136.06, 127.86, 122.62, 120.16, 117.79, 114.37, 70.73, 68.92, 54.04, 52.64. MS (FAB) *m/z* 577 (M+H)<sup>+</sup>. HRMS calcd. for C<sub>32</sub>H<sub>41</sub>O<sub>6</sub>N<sub>4</sub> 577.3026, found 577.3030.

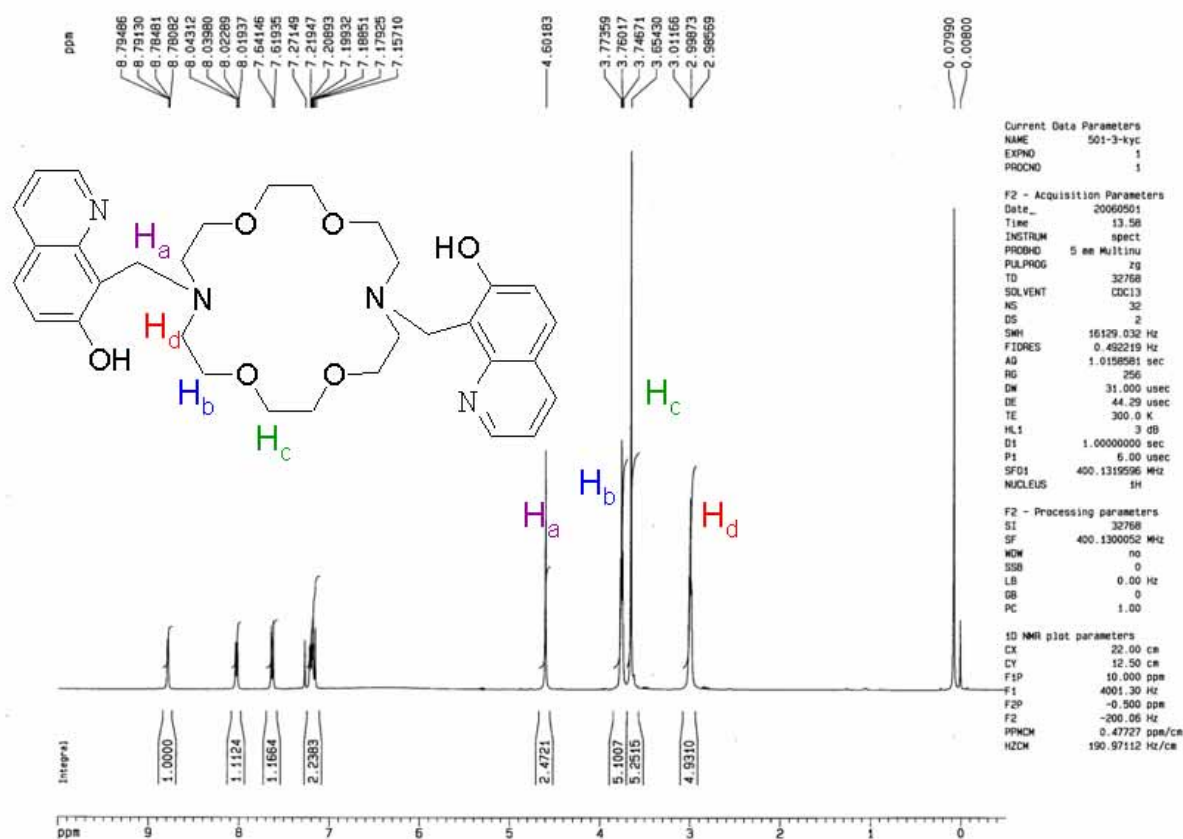

Figure S1. <sup>1</sup>H NMR spectra of **TDBQ** in CDCl<sub>3</sub>.

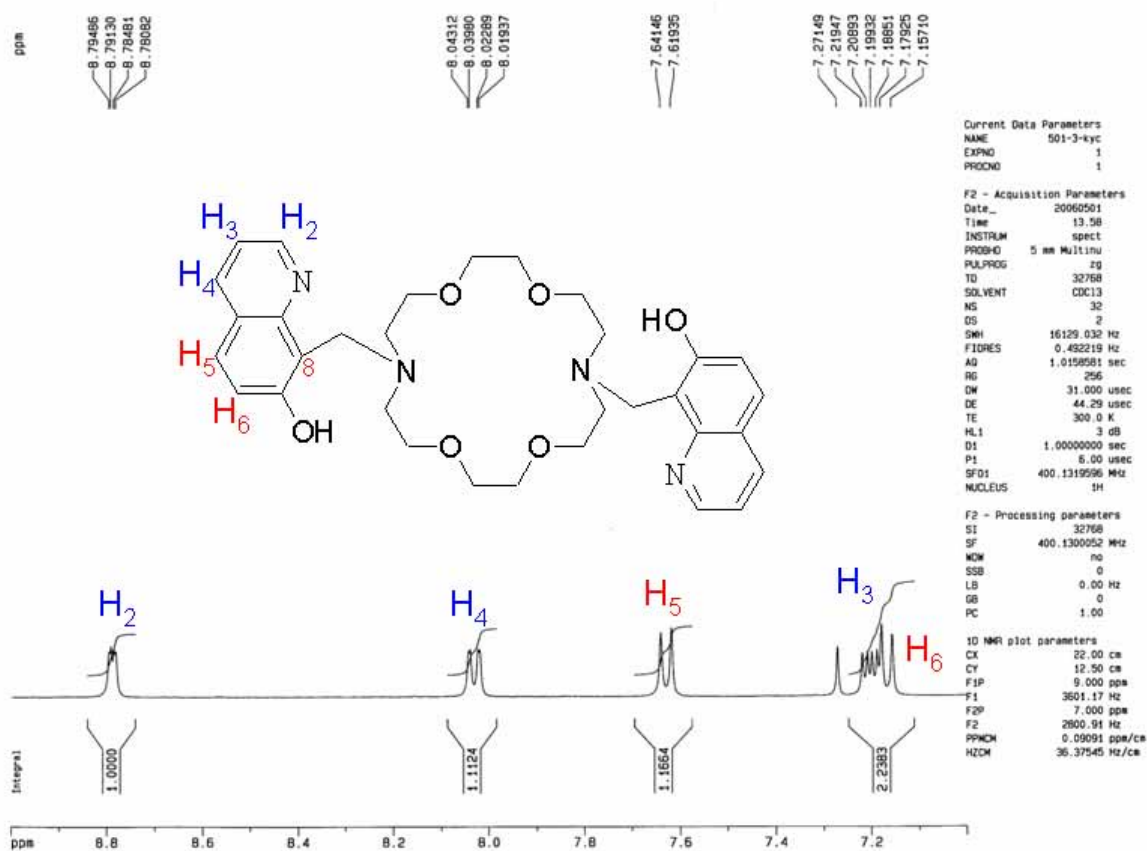

Figure S2. The extension of  $^1\text{H}$  NMR spectra of TDBQ in  $\text{CDCl}_3$ .

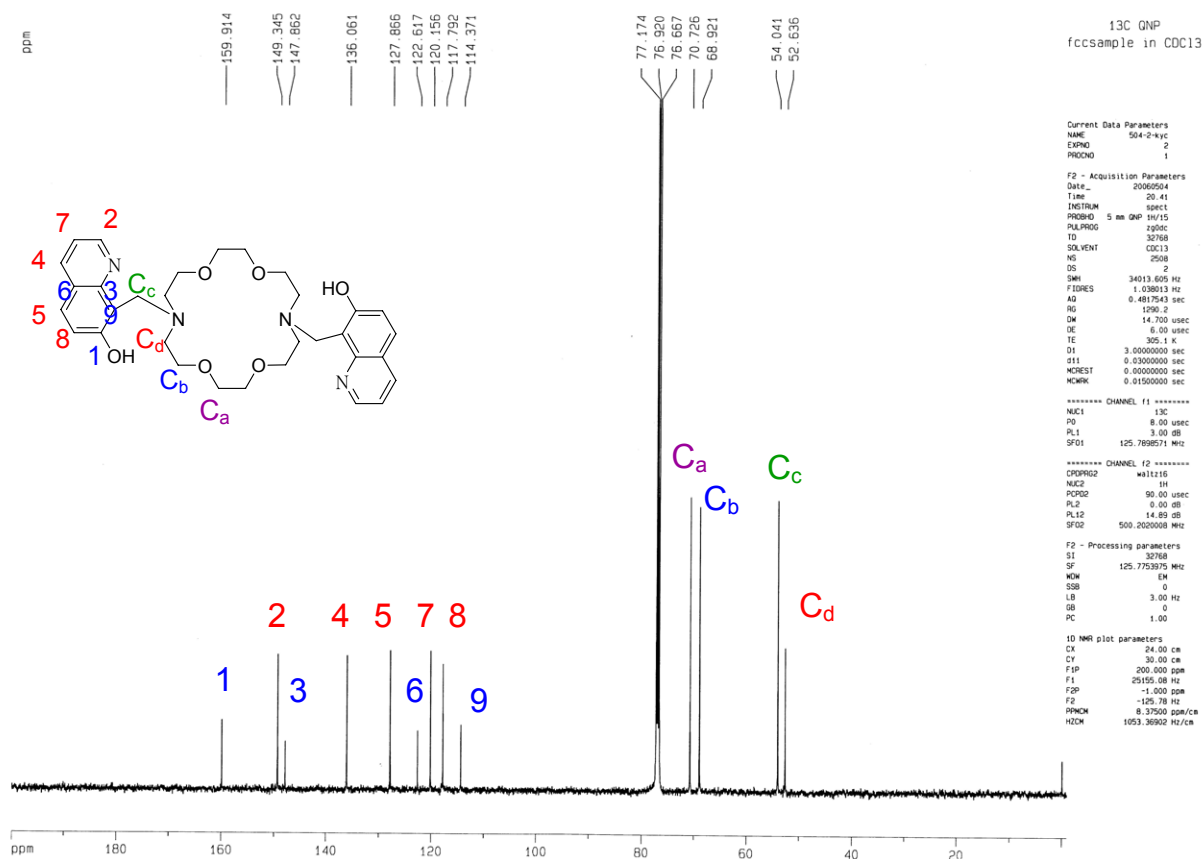

Figure S3. <sup>13</sup>C NMR of TDBQ in CDCl<sub>3</sub>. (125MHz)

[ Elemental Composition ] Page: 1  
 Data : 2006Jun08\_01HR-001 Date : 08-Jun-2006 11:17  
 Sample: HQ-C-HQ  
 Note : NBA  
 Inlet : Direct Ion Mode : FAB+  
 RT : 0.13 min Scan#: (1,6)  
 Elements : C 400/0, H 800/0, O 6/6, N 4/4  
 Mass Tolerance : 10mmu  
 Unsaturation (U.S.) : -0.5 - 100.0

| Observed m/z | Int% | Err [ppm / mmu] | U.S. | Composition                  |
|--------------|------|-----------------|------|------------------------------|
| 577.3030     | 44.1 | +0.7 / +0.4     | 14.5 | C 32 H 41 O 6 N 4 = 577.3026 |

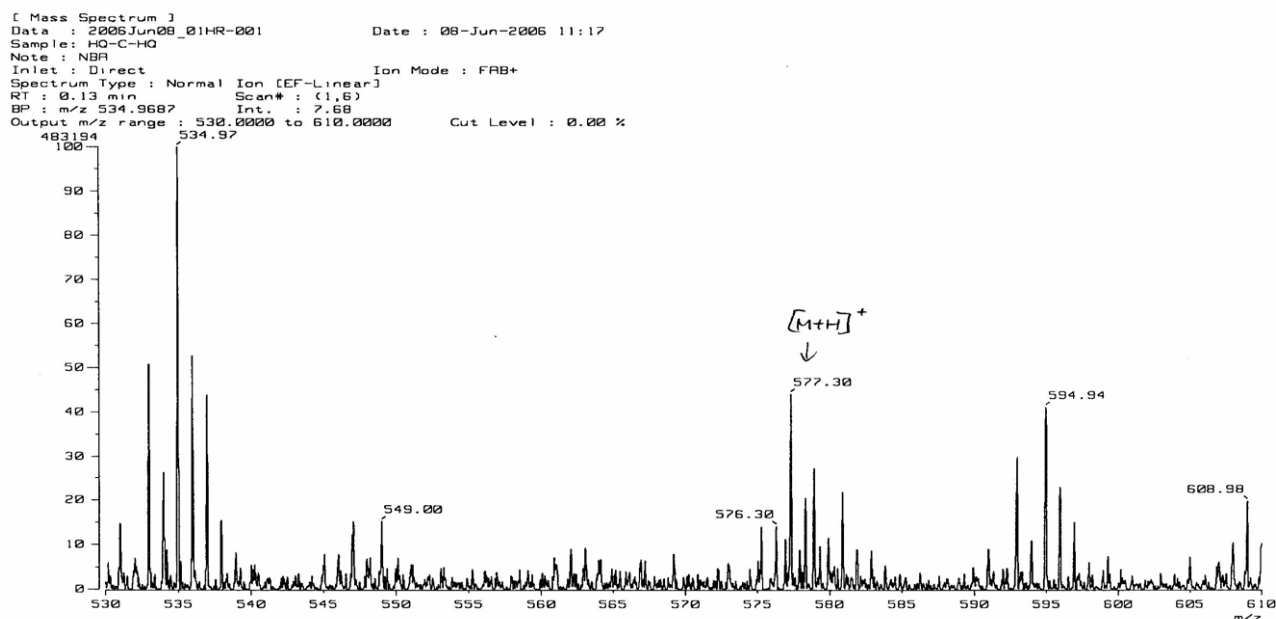

**Figure S4.** HRMS of TDBQ in CDCl<sub>3</sub>. (125MHz)

**UV-Vis and Fluorescence Titration of Compounds TDBQ with Hg<sup>2+</sup> Ions.** The stock solution of compound TDBQ ( $1.52 \times 10^{-5}$  M) was prepared by using spectroscopic grade MeOH-H<sub>2</sub>O (1:10, v/v). The solution of Hg<sup>2+</sup> ions ( $1 \times 10^{-2}$  M) was prepared by using mercury(II) perchlorate hydrate dissolved in H<sub>2</sub>O. The absorption and emission spectra of TDBQ (1.5 mL of  $7.8 \times 10^{-6}$  M stock solution) in a quartz cell (1 cm width) were recorded at 298 K.

### Absorption titration

The association constant  $K_a$  of 1:2 **TDBQ**/ $\text{Hg}^+$  complex formation obtained by the UV-Vis absorption method can be derived as follows:

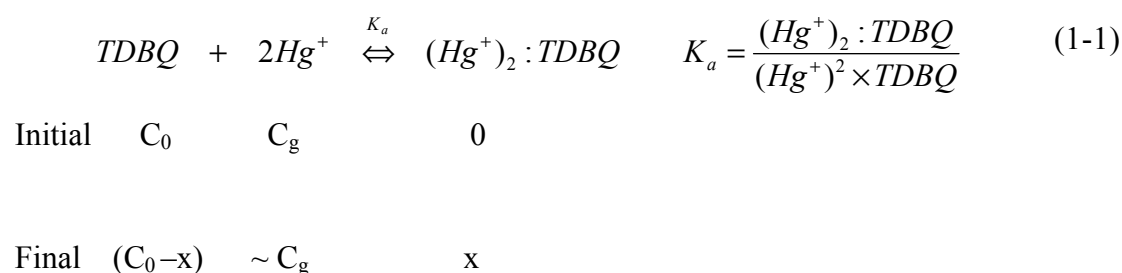

where  $C_0$  is the initially prepared concentration of **TDBQ**,  $C_g$  denotes the concentration of added  $\text{Hg}^{2+}$ . Note  $\text{Hg}^{2+}$  would be reduced to  $\text{Hg}^+$  in the presence of **TDBQ**. Assuming that the concentration of the added guest molecule ( $\text{Hg}^{2+}$ ) varies negligibly during the titration, the association constant  $K_a$  can thus be expressed by  $K_a = x / C_g^2(C_0 - x)$ , in which  $x$  denotes the amount of **TDBQ** being consumed for complexation. If the percentage of **TDBQ**- $\text{Hg}^+$  formation is less than of the initially prepared  $C_0$ , then

$$\frac{1}{K_a} = \frac{C_g^2 C_0}{x} - C_g^2 \quad (1-2)$$

On the other hand, the absorbance,  $A_{ab}$ , of the **TDBQ** and  $(\text{Hg}^+)_2 : \text{TDBQ}$  complex at a specific wavelength can be expressed by

$$A_{ab} = \epsilon_{\text{TDBQ}}(C_0 - x) + \epsilon_{\text{TDBQ-Hg}^+}x$$

$$x = \frac{A_{ab} - \epsilon_{\text{TDBQ}}C_0}{\epsilon_{\text{TDBQ-Hg}^+} - \epsilon_{\text{TDBQ}}} \Rightarrow \frac{1}{x} = \frac{\epsilon_{\text{TDBQ-Hg}^+} - \epsilon_{\text{TDBQ}}}{A_{ab} - \epsilon_{\text{TDBQ}}C_0} \quad 8$$



$$(1-3)$$

Plugging (1-3) into (1-2), we obtain

$$\frac{1}{K_a} + C_g^2 = \frac{C_g^2 C_0 (\epsilon_{TDBQ-Hg^+} - \epsilon_{TDBQ})}{(A_{ab} - \epsilon_{TDBQ} C_0)} \quad (1-4)$$

Both sides of (1-4) are divided by  $C_g^2 (\epsilon_{TDBQ-Hg^+} - \epsilon_{TDBQ})$  to obtain

$$\frac{C_0}{A_{ab} - \epsilon_{TDBQ} C_0} = \left[ \frac{1}{K_a (\epsilon_{TDBQ-Hg^+} - \epsilon_{TDBQ})} \right] \frac{1}{C_g^2} + \frac{1}{\epsilon_{TDBQ-Hg^+} - \epsilon_{TDBQ}} \quad (1)$$

where  $\epsilon_{TDBQ}$  and  $\epsilon_{TDBQ-Hg^+}$  are molar extinction coefficients of the **TDBQ** and  $(Hg^+)_2 : \text{TDBQ}$

complex, respectively, at a specific wavelength. The validity of this approach can be examined from

a linear plot for  $\frac{C_0}{A_{ab} - \epsilon_{TDBQ} C_0}$  versus  $\frac{1}{C_g^2}$ . The association constant  $K_a$  can thus be extracted

from intercept/[slope].

**Preparation of TDBQ-mercury crystal.** To the methanol solution (2 mL) of **TDBQ** (0.0056 g, mmol) was added to the aqua solution (2 mL) of  $Hg(ClO_4)_2$  (0.0081 g, mmole) in a 1:2 equivalent **TDBQ** and metal salt ration at room temperature to give a clear solution (pH = 7). Colorless crystals were obtained after standing for several days in *ca.* 61 % yield. Anal. Calc. for  $C_{32}H_{40}Cl_2Hg_2N_4O_{14}$ : C 32.66, H 3.43, O 19.03; Found: C 32.64, H 3.41, O 19.01. IR (KBr)  $\nu$  ( $cm^{-1}$ ): 3052 (w), 1686 (m), 1589 (s), 1504 (vs), 1478 (vs), 1428 (s), 1351 (m), 1223 (m), 1211 (w).

**Crystallographic Data Collection and Refinement.** The chosen crystals of **TDBQ** and **TDBQ**-mercury crystal were both mounted on a glass fiber. Data collections were carried out on a Siemens SMART diffractometer with a CCD detector with Mo radiation ( $\lambda = 0.71073 \text{ \AA}$ ) at 150 K. A preliminary orientation matrix and unit cell parameters were determined from 3 runs of 15 frames each, each frame correspond to a  $0.3^\circ$  scan in 10 s, following by spot integration and least-squares refinement. For each structure, data were measured using  $\omega$  scans of  $0.3^\circ$  per frame for 20 s until a complete hemisphere had been collected. Cell parameters were retrieved using SMART<sup>S1</sup> software and refined with SAINT<sup>S2</sup> on all observed reflections. Data reduction was performed with the SAINT<sup>S2</sup> software and corrected for Lorentz and polarization effects. Absorption corrections were applied with the program SADABS.<sup>S3</sup> Direct phase determination and subsequent difference Fourier map synthesis yielded the positions of all non-hydrogen atoms, which were subjected to anisotropic refinements. All Hydrogen atoms were fixed at calculated positions and refined using a riding mode. The final full-matrix, least-squares refinement on  $F^2$  was applied for all observed reflections [ $I > 2\sigma(I)$ ]. All calculations were performed by using the SHELXTL-PC V 5.03 software package.<sup>S4</sup> Crystallographic data and experimental details of refinements for structural analyses are given in Table S2.

Crystallographic data (excluding structure factors) of **TDBQ** and **TDBQ**-mercury crystal for the structures reported in this paper have been deposited with the Cambridge Crystallographic Data Centre as supplementary publication no. CCDC\*\*\*\*\* and CCDC\*\*\*\*\*. Copies of the data can be obtained free of charge on application to CCDC, 12 Union Road, Cambridge CB21EZ, UK (fax: (+44) 1223-336-033; email: [deposit@ccdc.cam.ac.uk](mailto:deposit@ccdc.cam.ac.uk)).

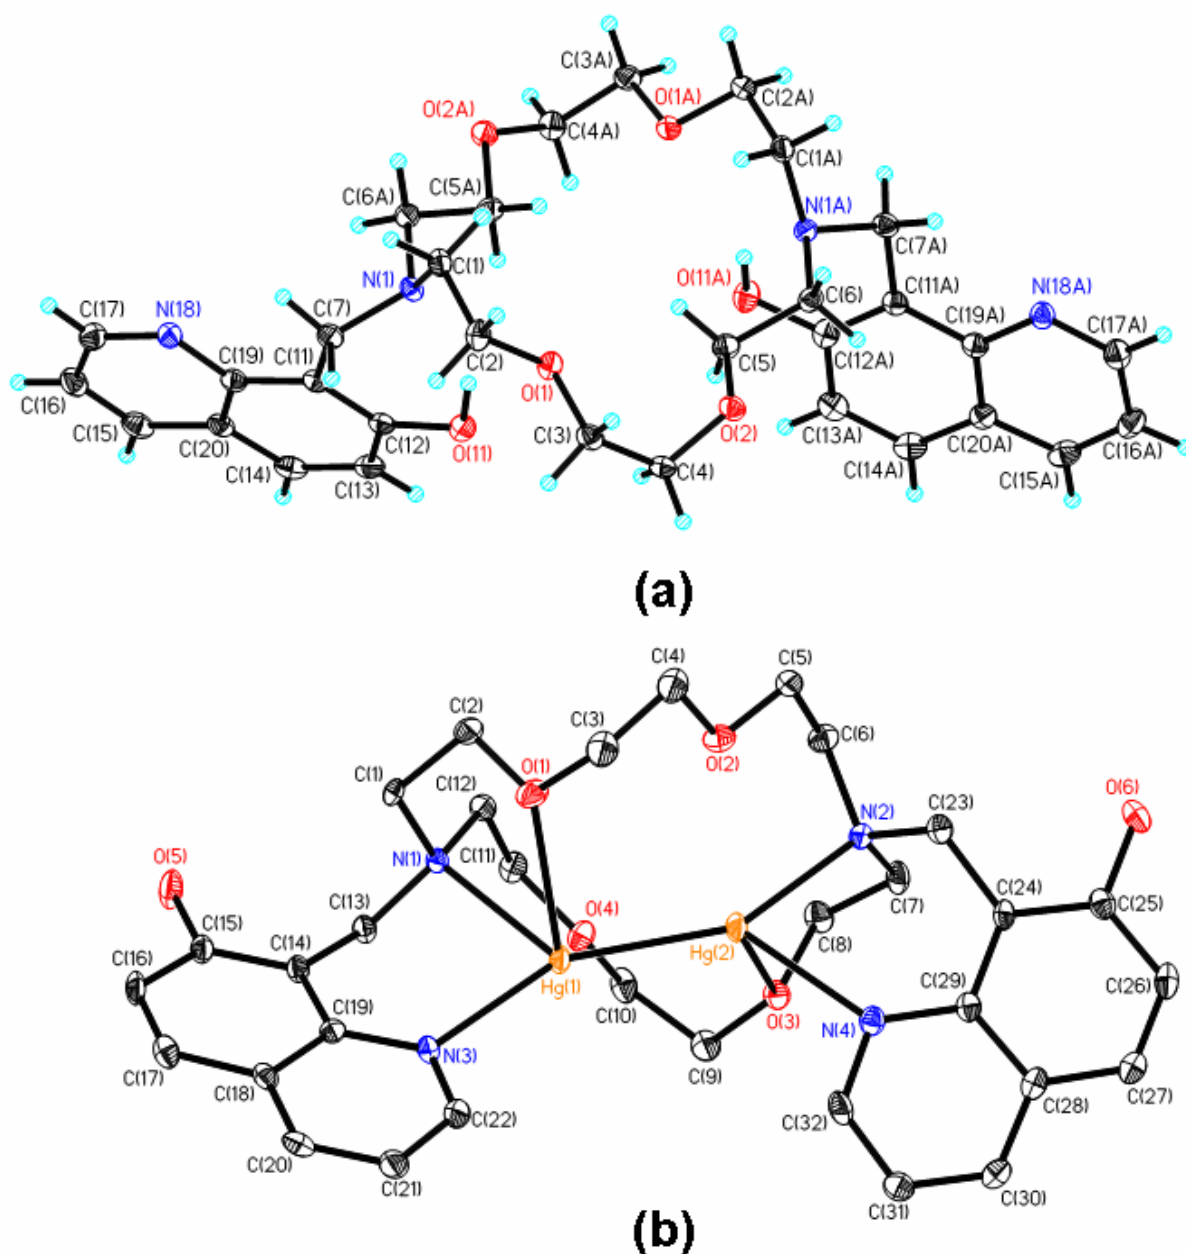

**Figure S5.** ORTEP diagram of (a) **TDBQ** and (b) **TDBQ-mercury** crystal with thermal ellipsoids shown at 30% probability level.

**Table S1.** Selected Bond Length (Å) and Angles (°) for **TDBQ-mercury** crystal

|            |          |            |          |
|------------|----------|------------|----------|
| Hg(1)–N(1) | 2.427(4) | Hg(2)–N(2) | 2.349(4) |
| Hg(1)–N(3) | 2.317(4) | Hg(2)–N(4) | 2.401(4) |

|                  |           |                  |           |
|------------------|-----------|------------------|-----------|
| Hg(1)–O(1)       | 2.685(4)  | Hg(2)–O(3)       | 2.643(4)  |
| Hg(1)–Hg(2)      | 2.5207(3) |                  |           |
| N(3)–Hg(1)–N(1)  | 83.3(2)   | N(2)–Hg(2)–N(4)  | 80.6(2)   |
| N(3)–Hg(1)–Hg(2) | 154.7(1)  | N(2)–Hg(2)–Hg(1) | 150.5(1)  |
| N(1)–Hg(1)–Hg(2) | 121.5(1)  | N(4)–Hg(2)–Hg(1) | 128.8(1)  |
| N(3)–Hg(1)–O(1)  | 102.8(1)  | N(2)–Hg(2)–O(3)  | 71.0(1)   |
| N(1)–Hg(1)–O(1)  | 66.9(1)   | N(4)–Hg(2)–O(3)  | 84.5(1)   |
| Hg(2)–Hg(1)–O(1) | 92.88(9)  | Hg(1)–Hg(2)–O(3) | 105.53(8) |

**Table S2.** Crystallographic Data and Refinement Parameters for **TDBQ** and **TDBQ**-mercury crystal.

|                   | <b>TDBQ</b>                                                   | <b>TDBQ</b> -mercury crystal                                                                   |
|-------------------|---------------------------------------------------------------|------------------------------------------------------------------------------------------------|
| empirical formula | C <sub>32</sub> H <sub>40</sub> N <sub>4</sub> O <sub>6</sub> | C <sub>32</sub> H <sub>40</sub> Cl <sub>2</sub> Hg <sub>2</sub> N <sub>4</sub> O <sub>14</sub> |
| color             | colorless                                                     | colorless                                                                                      |
| fw                | 576.68                                                        | 1176.76                                                                                        |
| cryst syst        | Orthorhombic                                                  | Triclinic                                                                                      |
| space group       | <i>F</i> dd2                                                  | <i>P</i> -1                                                                                    |
| <i>a</i> (Å)      | 16.517(1)                                                     | 9.3342(5)                                                                                      |
| <i>b</i> (Å)      | 34.853(3)                                                     | 12.9306(7)                                                                                     |
| <i>c</i> (Å)      | 9.9291(7)                                                     | 16.776(1)                                                                                      |
| $\alpha$ (°)      | 90.0                                                          | 75.396(1)                                                                                      |
| $\beta$ (°)       | 90.0                                                          | 85.285(1)                                                                                      |
| $\gamma$ (°)      | 90.0                                                          | 69.475(1)                                                                                      |

---

|                                                      |           |           |
|------------------------------------------------------|-----------|-----------|
| $V (\text{\AA}^3)$                                   | 5715.9(7) | 1835.0(2) |
| $Z$                                                  | 8         | 2         |
| temp (K)                                             | 150 (1)   | 150 (2)   |
| abs coeff ( $\text{mm}^{-1}$ )                       | 0.093     | 8.576     |
| obsd rflns [ $I > 2\sigma(I)$ ]                      | 1797      | 7162      |
| Final $R(F)$ [ $I > 2\sigma(I)$ ] <sup>a</sup>       | 0.0274    | 0.0345    |
| w $R(F^2)$ indices [ $I > 2\sigma(I)$ ] <sup>a</sup> | 0.0385    | 0.0775    |

$$^a R(F) = \sum |F_o - F_c| / \sum |F_o| \text{ and } wR(F^2) = [\sum w |F_o^2 - F_c^2|^2 / \sum w (F_o^4)]^{1/2}.$$

## XANES

The X-ray absorption experiments were carried out at the National Synchrotron Radiation Research Center (NSRRC), Hsinchu, Taiwan. All spectra of Hg L<sub>III</sub>-edge were recorded at room temperature at the wiggler beamline 17C with a double Si(111)-crystal monochromator. The energy resolution  $\Delta E/E$  is  $2 \times 10^{-4}$ . High harmonics were removed by using Rh-coated mirrors. XANES spectrum of **TDBQ**-mercury powder was recorded in fluorescence mode. The spectra of reference compounds, HgCl<sub>2</sub> and Hg<sub>2</sub>Cl<sub>2</sub>, were recorded in transmission mode. Energy calibration of all spectra was based on HgCl<sub>2</sub> at 12284.1 eV.<sup>S5</sup>

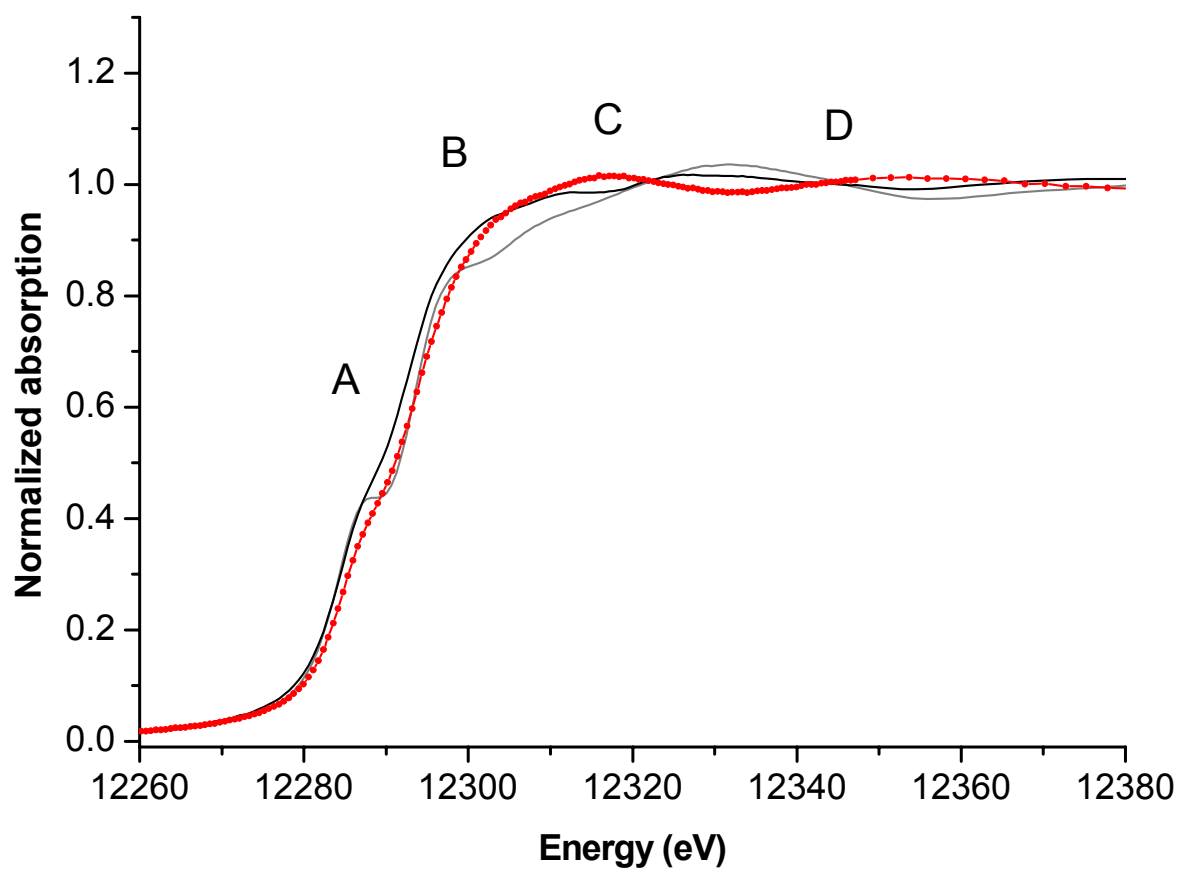

**Figure S6.** Normalized XANES spectra for **TDBQ-mercury crystal** (- · -), HgCl<sub>2</sub> (Gray), and Hg<sub>2</sub>Cl<sub>2</sub> (black).

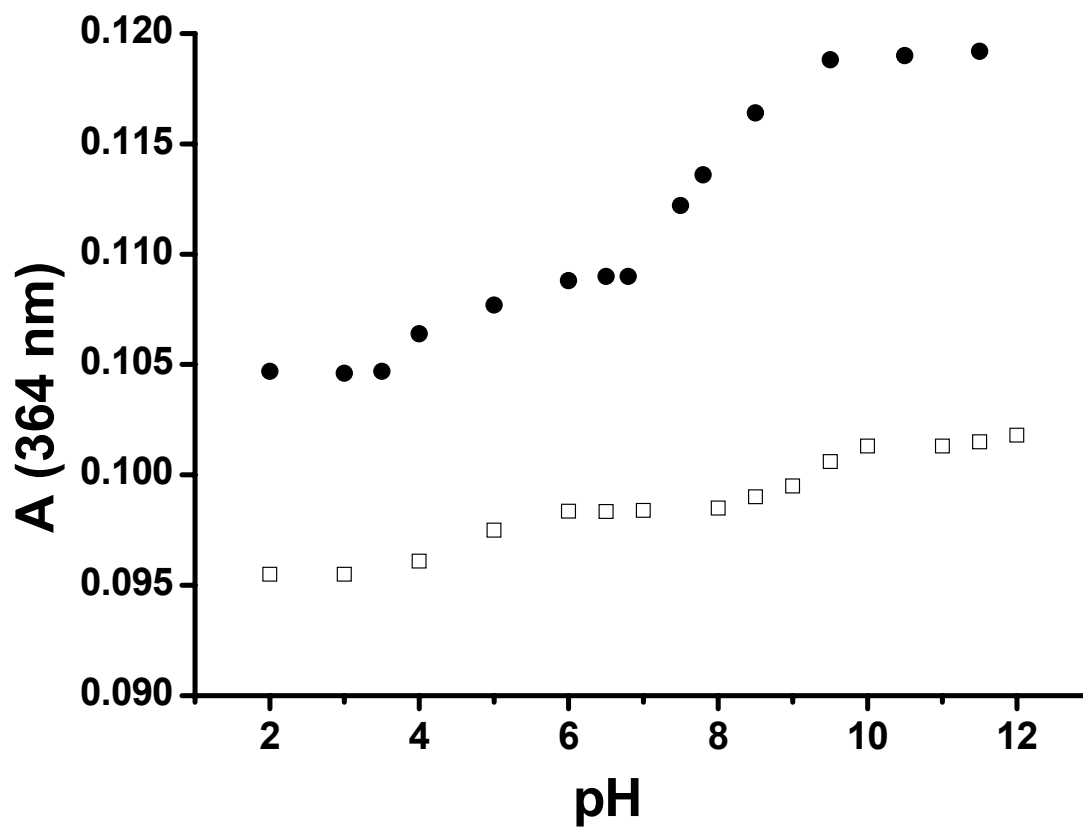

**Figure S7.** Absorbance (364 nm) of TDBQ (1.5  $\mu\text{M}$ ) in aqueous solution at various pH values :  $\square$ , TDBQ alone;  $\bullet$ , TDBQ with  $\text{Hg}^{2+}$  (1.5  $\mu\text{M}$ ).

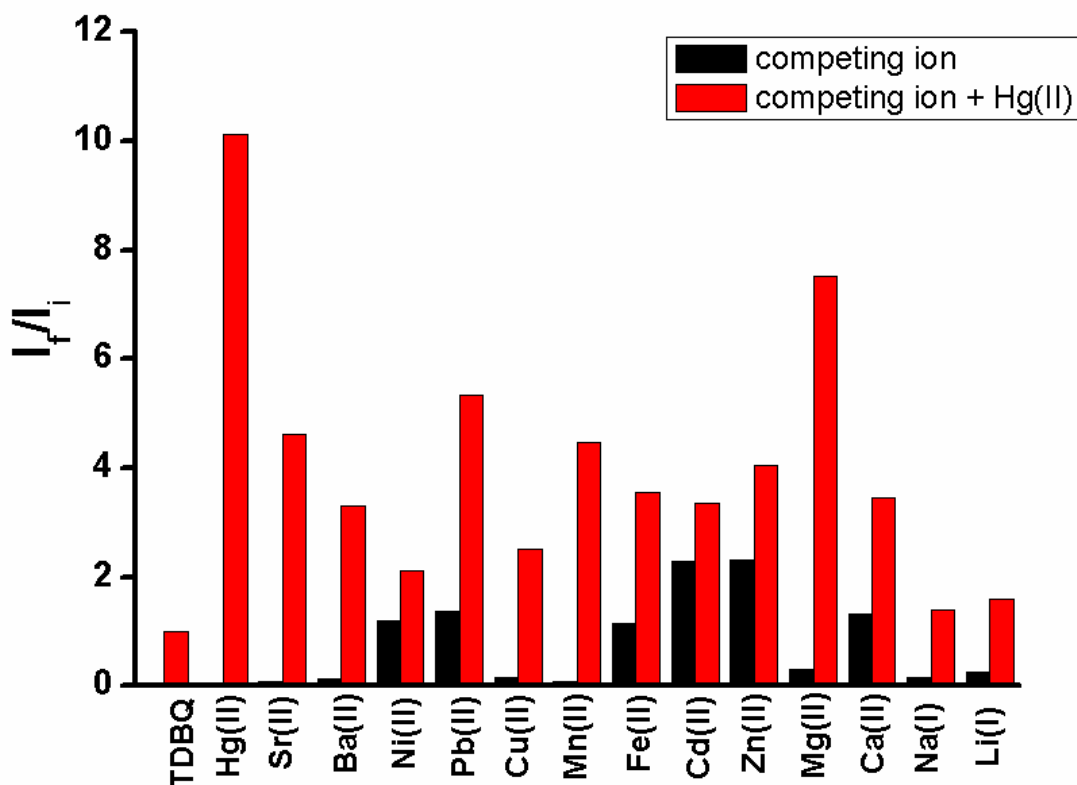

**Figure S8.** Fluorescence responses of **TDBQ** to various metal ions. Bars represent the final integrated fluorescence response ( $I_f$ ) over the initial integrated emission ( $I_i$ ). Initial spectrum was acquired in  $H_2O$ , pH 7. Black bars represent the addition of a 1 mM of the appropriate metal ion to a 1  $\mu M$  solution of **TDBQ**. Red bars represent the addition of 1 mM  $Hg^{2+}$  to solutions containing **TDBQ**. Excitation was provided at 358 nm, and the emission was integrated over 400 to 700 nm.



**References:**

- S1. *SMART V 4.043 Software for CCD Detector System*; Siemens Analytical Instruments Division: Madison, WI, 1995.
- S2. *SAINT V 4.035 Software for CCD Detector System*; Siemens Analytical Instruments Division: Madison, WI, 1995.
- S3. G. M. Sheldrick, *Program for the Refinement of Crystal Structures*; University of Göttingen: Göttingen, Germany, 1993.
- S4. SHELXTL 5.03 (PC-Version), *Program Library for Structure Solution and Molecular Graphics*; Siemens Analytical Instruments Division: Madison, WI, 1995.
- S5. A. Bernaus, X. Gaona, A. Ivask, A. Kahru and M. Valiente, *Anal. Bioanal. Chem.* 2005, **382**, 1541.
